# Supplementary material for: Cell-type-directed design of synthetic enhancers
Source: PubMed Central journal article supplement (PMC10830415; doi:10.1038/s41586-023-06936-2), 2023-12-12
Supplement: 41586_2023_6936_MOESM2_ESM.pdf [file 41586_2023_6936_MOESM2_ESM.pdf]

## Reporting Summary

Nature Portfolio wishes to improve the reproducibility of the work that we publish. This form provides structure for consistency and transparency in reporting. For further information on Nature Portfolio policies, see our [Editorial Policies](#) and the [Editorial Policy Checklist](#).

### Statistics

For all statistical analyses, confirm that the following items are present in the figure legend, table legend, main text, or Methods section.

- | n/a                                 | Confirmed                                                                                                                                                                                                                                                                                      |
|-------------------------------------|------------------------------------------------------------------------------------------------------------------------------------------------------------------------------------------------------------------------------------------------------------------------------------------------|
| <input type="checkbox"/>            | <input checked="" type="checkbox"/> The exact sample size ( $n$ ) for each experimental group/condition, given as a discrete number and unit of measurement                                                                                                                                    |
| <input checked="" type="checkbox"/> | <input type="checkbox"/> A statement on whether measurements were taken from distinct samples or whether the same sample was measured repeatedly                                                                                                                                               |
| <input checked="" type="checkbox"/> | <input type="checkbox"/> The statistical test(s) used AND whether they are one- or two-sided<br><i>Only common tests should be described solely by name; describe more complex techniques in the Methods section.</i>                                                                          |
| <input checked="" type="checkbox"/> | <input type="checkbox"/> A description of all covariates tested                                                                                                                                                                                                                                |
| <input checked="" type="checkbox"/> | <input type="checkbox"/> A description of any assumptions or corrections, such as tests of normality and adjustment for multiple comparisons                                                                                                                                                   |
| <input type="checkbox"/>            | <input checked="" type="checkbox"/> A full description of the statistical parameters including central tendency (e.g. means) or other basic estimates (e.g. regression coefficient) AND variation (e.g. standard deviation) or associated estimates of uncertainty (e.g. confidence intervals) |
| <input checked="" type="checkbox"/> | <input type="checkbox"/> For null hypothesis testing, the test statistic (e.g. $F$ , $t$ , $r$ ) with confidence intervals, effect sizes, degrees of freedom and $P$ value noted<br><i>Give <math>P</math> values as exact values whenever suitable.</i>                                       |
| <input checked="" type="checkbox"/> | <input type="checkbox"/> For Bayesian analysis, information on the choice of priors and Markov chain Monte Carlo settings                                                                                                                                                                      |
| <input checked="" type="checkbox"/> | <input type="checkbox"/> For hierarchical and complex designs, identification of the appropriate level for tests and full reporting of outcomes                                                                                                                                                |
| <input type="checkbox"/>            | <input checked="" type="checkbox"/> Estimates of effect sizes (e.g. Cohen's $d$ , Pearson's $r$ ), indicating how they were calculated                                                                                                                                                         |

*Our web collection on [statistics for biologists](#) contains articles on many of the points above.*

### Software and code

Policy information about [availability of computer code](#)

|                 |                                                                                                                                                                                                                                                                                                                                                                                                                                                                                                                                                                                                                                                                                                                                                                                                                                                                                                                                           |
|-----------------|-------------------------------------------------------------------------------------------------------------------------------------------------------------------------------------------------------------------------------------------------------------------------------------------------------------------------------------------------------------------------------------------------------------------------------------------------------------------------------------------------------------------------------------------------------------------------------------------------------------------------------------------------------------------------------------------------------------------------------------------------------------------------------------------------------------------------------------------------------------------------------------------------------------------------------------------|
| Data collection | Confocal images: ZEN blue 3.4.91                                                                                                                                                                                                                                                                                                                                                                                                                                                                                                                                                                                                                                                                                                                                                                                                                                                                                                          |
| Data analysis   | <p>Custom codes: <a href="https://doi.org/10.5281/zenodo.10184648">https://doi.org/10.5281/zenodo.10184648</a></p> <p>DL Python environment to use DeepMEL 1.0, DeepMEL2 1.0, and DeepFlyBrain 1.0:<br/>python=3.7 tensorflow-gpu=1.15 numpy=1.19.5 matplotlib=3.1.1 shap=0.29.3 ipykernel=5.1.2 h5py=2.10.0</p> <p>DL Python environment to train GAN models:<br/>python=3.6 tensorflow-gpu=1.14.0 keras-gpu=2.2.4 numpy=1.16.2 matplotlib=3.1.1 shap=0.29.3 ipykernel=5.1.2</p> <p>To perform motif analysis: TF-Modisco 0.5.5.4, Tomtom (MEME 5.5.1), ClusterBuster 2022-04-21, BEDTools 2.30.0<br/>To create higher-order background sequences: INCLUSIVE 3.2</p> <p>To calculate statics: Scipy 1.6.0</p> <p>To train ChromBPNet model: ChromBPNet 1.3-pre-release</p> <p>ATAC-seq and ChIP-seq data analysis:<br/>Demultiplexing with bcl2fastq 2.20<br/>Adapter trimming with trimgalore 0.6.7<br/>Mapping with bwa-mem2 2.2.1</p> |

Sorting with SAMtools 1.16.1  
 Deduplicating with SAMtools 1.16.1  
 Removing blacklist regions with SAMtools 1.16.1  
 Generating bigwig with deepTools 3.5.0  
 Peak calling with MACS2 2.1.2.1

For manuscripts utilizing custom algorithms or software that are central to the research but not yet described in published literature, software must be made available to editors and reviewers. We strongly encourage code deposition in a community repository (e.g. GitHub). See the Nature Portfolio [guidelines for submitting code & software](#) for further information.

## Data

Policy information about [availability of data](#)

All manuscripts must include a [data availability statement](#). This statement should provide the following information, where applicable:

- Accession codes, unique identifiers, or web links for publicly available datasets
- A description of any restrictions on data availability
- For clinical datasets or third party data, please ensure that the statement adheres to our [policy](#)

Cloned *Drosophila* and human sequences were provided as Supplementary Tables. DeepMEL, DeepMEL2, and DeepFlyBrain deep learning model files were obtained from Kipoi (<http://kipoi.org/models/DeepMEL>, <https://kipoi.org/models/DeepFlyBrain>) with Zenodo record ids 3592129, 4590308, and 5153337. The fasta files used to train GAN models and the trained GAN models are available on Zenodo at <https://doi.org/10.5281/zenodo.6701504>. Custom genomes (hg38 and dm6) generated in this study are available on Zenodo at <https://doi.org/10.5281/zenodo.10184648>. Chromatin accessibility values in Kenyon Cells in adult *Drosophila* brains were obtained from GSE16369739. In vitro saturation mutagenesis on IRF4 data was obtained from <https://kircherlab.bihealth.org/satMutMPRA/>. Chromatin accessibility of *Drosophila* and transduced melanoma lines and ZEB2 ChIP-seq data generated for this study have been submitted to the NCBI Gene Expression Omnibus (GEO, <https://www.ncbi.nlm.nih.gov/geo/>) under accession number GSE240003.

## Research involving human participants, their data, or biological material

Policy information about studies with [human participants or human data](#). See also policy information about [sex, gender \(identity/presentation\), and sexual orientation](#) and [race, ethnicity and racism](#).

Reporting on sex and gender

Reporting on race, ethnicity, or other socially relevant groupings

Population characteristics

Recruitment

Ethics oversight

Note that full information on the approval of the study protocol must also be provided in the manuscript.

## Field-specific reporting

Please select the one below that is the best fit for your research. If you are not sure, read the appropriate sections before making your selection.

Life sciences  Behavioural & social sciences  Ecological, evolutionary & environmental sciences

For a reference copy of the document with all sections, see [nature.com/documents/nr-reporting-summary-flat.pdf](https://www.nature.com/documents/nr-reporting-summary-flat.pdf)

## Life sciences study design

All studies must disclose on these points even when the disclosure is negative.

Sample size

Data exclusions

Replication

Randomization

|               |                                                                                                                                                                                                                                                                          |
|---------------|--------------------------------------------------------------------------------------------------------------------------------------------------------------------------------------------------------------------------------------------------------------------------|
| Randomization | GC content of the genomic sequences.<br>Flies fitting the gender(equal amount of male and female) and age (<10days) criteria were selected randomly for all experiments. In this study, we didn't perform experiments that needed to be allocated into different groups. |
| Blinding      | The investigators were blinded when performing cloning, transfection, antibody staining, and luciferase experiments by using enhancer IDs.                                                                                                                               |

## Reporting for specific materials, systems and methods

We require information from authors about some types of materials, experimental systems and methods used in many studies. Here, indicate whether each material, system or method listed is relevant to your study. If you are not sure if a list item applies to your research, read the appropriate section before selecting a response.

### Materials & experimental systems

| n/a                                 | Involved in the study                                           |
|-------------------------------------|-----------------------------------------------------------------|
| <input type="checkbox"/>            | <input checked="" type="checkbox"/> Antibodies                  |
| <input type="checkbox"/>            | <input checked="" type="checkbox"/> Eukaryotic cell lines       |
| <input checked="" type="checkbox"/> | <input type="checkbox"/> Palaeontology and archaeology          |
| <input type="checkbox"/>            | <input checked="" type="checkbox"/> Animals and other organisms |
| <input checked="" type="checkbox"/> | <input type="checkbox"/> Clinical data                          |
| <input checked="" type="checkbox"/> | <input type="checkbox"/> Dual use research of concern           |
| <input checked="" type="checkbox"/> | <input type="checkbox"/> Plants                                 |

### Methods

| n/a                                 | Involved in the study                           |
|-------------------------------------|-------------------------------------------------|
| <input type="checkbox"/>            | <input checked="" type="checkbox"/> ChIP-seq    |
| <input checked="" type="checkbox"/> | <input type="checkbox"/> Flow cytometry         |
| <input checked="" type="checkbox"/> | <input type="checkbox"/> MRI-based neuroimaging |

## Antibodies

|                 |                                                                                                                                                                                                                                                                                                                                                                                                                                                                                                                                                                                                                                                                                                                                                                                                                                                                                                                                                                                                                                                                                                                                                                                                                                                                                                                                                                                                                                                                                         |
|-----------------|-----------------------------------------------------------------------------------------------------------------------------------------------------------------------------------------------------------------------------------------------------------------------------------------------------------------------------------------------------------------------------------------------------------------------------------------------------------------------------------------------------------------------------------------------------------------------------------------------------------------------------------------------------------------------------------------------------------------------------------------------------------------------------------------------------------------------------------------------------------------------------------------------------------------------------------------------------------------------------------------------------------------------------------------------------------------------------------------------------------------------------------------------------------------------------------------------------------------------------------------------------------------------------------------------------------------------------------------------------------------------------------------------------------------------------------------------------------------------------------------|
| Antibodies used | 1 - Rabbit polyclonal anti-GFP (1:1000 dilution); Life Technologies CAT# A-6455; RRID: AB_221570<br>2 - Donkey polyclonal anti-rabbit Alexa Fluor 488 (1:500 dilution); Life Technologies CAT# A-21206; RRID: AB_2535792<br>3 - Rabbit anti-ZEB2; Bethyl CAT# A302-473A (1mg/ml and we used 5 micrograms for ChIP)<br>4 - Mouse anti-Dachshund (1:250 dilution); DSHB; CAT# dac1-1<br>5 - Alexa Fluor 647 goat anti-mouse IgG (1:500 dilution); Invitrogen, CAT# A-21235                                                                                                                                                                                                                                                                                                                                                                                                                                                                                                                                                                                                                                                                                                                                                                                                                                                                                                                                                                                                                |
| Validation      | 1- References provided, statement on manufacturer's website: "This Antibody was verified by Relative expression to ensure that the antibody binds to the antigen stated.". Selected references out of 238: PMID 36067320, 35142344, 34908527, 34644579, 33932333, 33846330, 33463521, 33174166, 33112231, 32640222.<br>2- References provided, no statement on manufacturer's website. Selected references out of 6277: PMID 36067320, 35142344, 34908527, 34644579, 33932333, 33846330, 33463521, 33174166, 33112231, 32640222.<br>3- Testing and references provided, we performed ChIP-seq using ZEB2 antibody and the most enriched motif was the ZEB2 motif. No statement on the manufacturer's website. References: PMID 33614228, 20515682<br>4- References provided, statement on manufacturer's website: "The antibody reproduces the pattern observed by in situ hybridization with a dac cDNA probe (unpublished observations) and an enhancer trap insert in dac.". References: PMID 7821215, 17868668, 32781577, 18430931, 25670791, 8756723, 9845371, 24142104, 22874913, 34409041, 34322481, 33982759, 32738261, 32781577, 32184260, 31453329.<br>5- References provided, statement on the manufacturer's website: "The antibody "was used with a concentration of 2µg/mL.". Selected references out of 1448: PMID 35297981, 35017509, 33570489, 32878938, 32649914, 33659324, 32579612, 32317641, 37332603, 36879821, 36355348, 36649336, 34459871, 34605405, 33689682. |

## Eukaryotic cell lines

Policy information about [cell lines and Sex and Gender in Research](#)

|                                                                   |                                                                                                                                                                                                                                                                                                                                                                                                                                                                                                                                                                                                                                                                                                                                |
|-------------------------------------------------------------------|--------------------------------------------------------------------------------------------------------------------------------------------------------------------------------------------------------------------------------------------------------------------------------------------------------------------------------------------------------------------------------------------------------------------------------------------------------------------------------------------------------------------------------------------------------------------------------------------------------------------------------------------------------------------------------------------------------------------------------|
| Cell line source(s)                                               | MM001, MM047, and MM099 were obtained from Prof. Dr. Ghanem Ghanem with a Material Transfer Agreement. HEK293T was obtained from ATCC (CAT# CRL-3216).                                                                                                                                                                                                                                                                                                                                                                                                                                                                                                                                                                         |
| Authentication                                                    | We have used MM001, MM047, and MM099 in previous studies (Verfaillie et al., Nature Communications, 2015; Wouters et al., Nature Cell Biology 2020; Minnoye et al., Genome Research, 2020; Kalender-Atak et al., Genome Research 2021). We authenticated the cell lines by tracking their morphology overtime and by checking their genomic profile and mutations (Verfaillie et al., Kalender-Atak et al.), transcriptomic profile (Wouters et al.), and epigenomic profile (Verfaillie et al., Wouters et al., Kalender-Atak et al.). HEK293T cells were only used for lentivirus production in this study, and the final products were tested and confirmed by sequencing. No authentication was needed for this cell line. |
| Mycoplasma contamination                                          | Cell lines were tested for mycoplasma contamination, and were found negative.                                                                                                                                                                                                                                                                                                                                                                                                                                                                                                                                                                                                                                                  |
| Commonly misidentified lines (See <a href="#">ICLAC</a> register) | No commonly misidentified cell lines were used in this study.                                                                                                                                                                                                                                                                                                                                                                                                                                                                                                                                                                                                                                                                  |

## Animals and other research organisms

Policy information about [studies involving animals](#); [ARRIVE guidelines](#) recommended for reporting animal research, and [Sex and Gender in Research](#)

|                         |                                                                                                                                                           |
|-------------------------|-----------------------------------------------------------------------------------------------------------------------------------------------------------|
| Laboratory animals      | Transgenic <i>Drosophila melanogaster</i> strains were used in this study. Young adult flies (<10-days-old) were used when performing antibody stainings. |
| Wild animals            | No wild animals were used.                                                                                                                                |
| Reporting on sex        | Sexes were equally mixed when performing antibody staining on adult <i>Drosophila melanogaster</i> brains.                                                |
| Field-collected samples | No field-collected samples were used.                                                                                                                     |
| Ethics oversight        | No approval required.                                                                                                                                     |

Note that full information on the approval of the study protocol must also be provided in the manuscript.

## Plants

|                       |                      |
|-----------------------|----------------------|
| Seed stocks           | No plants were used. |
| Novel plant genotypes | No plants were used. |
| Authentication        | No plants were used. |

## ChIP-seq

### Data deposition

- Confirm that both raw and final processed data have been deposited in a public database such as [GEO](#).
- Confirm that you have deposited or provided access to graph files (e.g. BED files) for the called peaks.

|                                                                    |                                             |
|--------------------------------------------------------------------|---------------------------------------------|
| Data access links<br><i>May remain private before publication.</i> | GSE240003                                   |
| Files in database submission                                       | MM001_ZEB2_ChIP-seq<br>MM001_input_ChIP-seq |
| Genome browser session<br>(e.g. <a href="#">UCSC</a> )             | no longer applicable                        |

### Methodology

|                         |                                                                                                                                                                                                                                                                                |
|-------------------------|--------------------------------------------------------------------------------------------------------------------------------------------------------------------------------------------------------------------------------------------------------------------------------|
| Replicates              | n=1                                                                                                                                                                                                                                                                            |
| Sequencing depth        | ZEB2_ChIP-seq: 83410868<br>input_ChIP-seq: 168512695                                                                                                                                                                                                                           |
| Antibodies              | Rabbit anti-ZEB2; Bethyl CAT# A302-473A                                                                                                                                                                                                                                        |
| Peak calling parameters | macs2 callpeak default parameters                                                                                                                                                                                                                                              |
| Data quality            | 31866 peaks are called with 5% FDR                                                                                                                                                                                                                                             |
| Software                | Demultiplexing with bcl2fastq 2.20<br>adapter trimming with trimgalore 0.6.7<br>mapping with bwa-mem2 2.2.1<br>sorting with SAMtools 1.16.1<br>deduplicating with SAMtools 1.16.1<br>removing blacklist regions with SAMtools 1.16.1<br>generating bigwig with deepTools 3.5.0 |
